# Supplementary material for: The Effect of Caregiver-Mediated Mobility Interventions in Hospitalized Patients on Patient, Caregiver, and Health System Outcomes: A Systematic Review
Source: PubMed Central journal article supplement — Arch Rehabil Res Clin Transl. 2020 Apr 19;2(3):100053. doi: 10.1016/j.arrct.2020.100053 (PMC7853382; doi:10.1016/j.arrct.2020.100053), 2020-04-19
Supplement: mmc2.pdf [file mmc2.pdf]

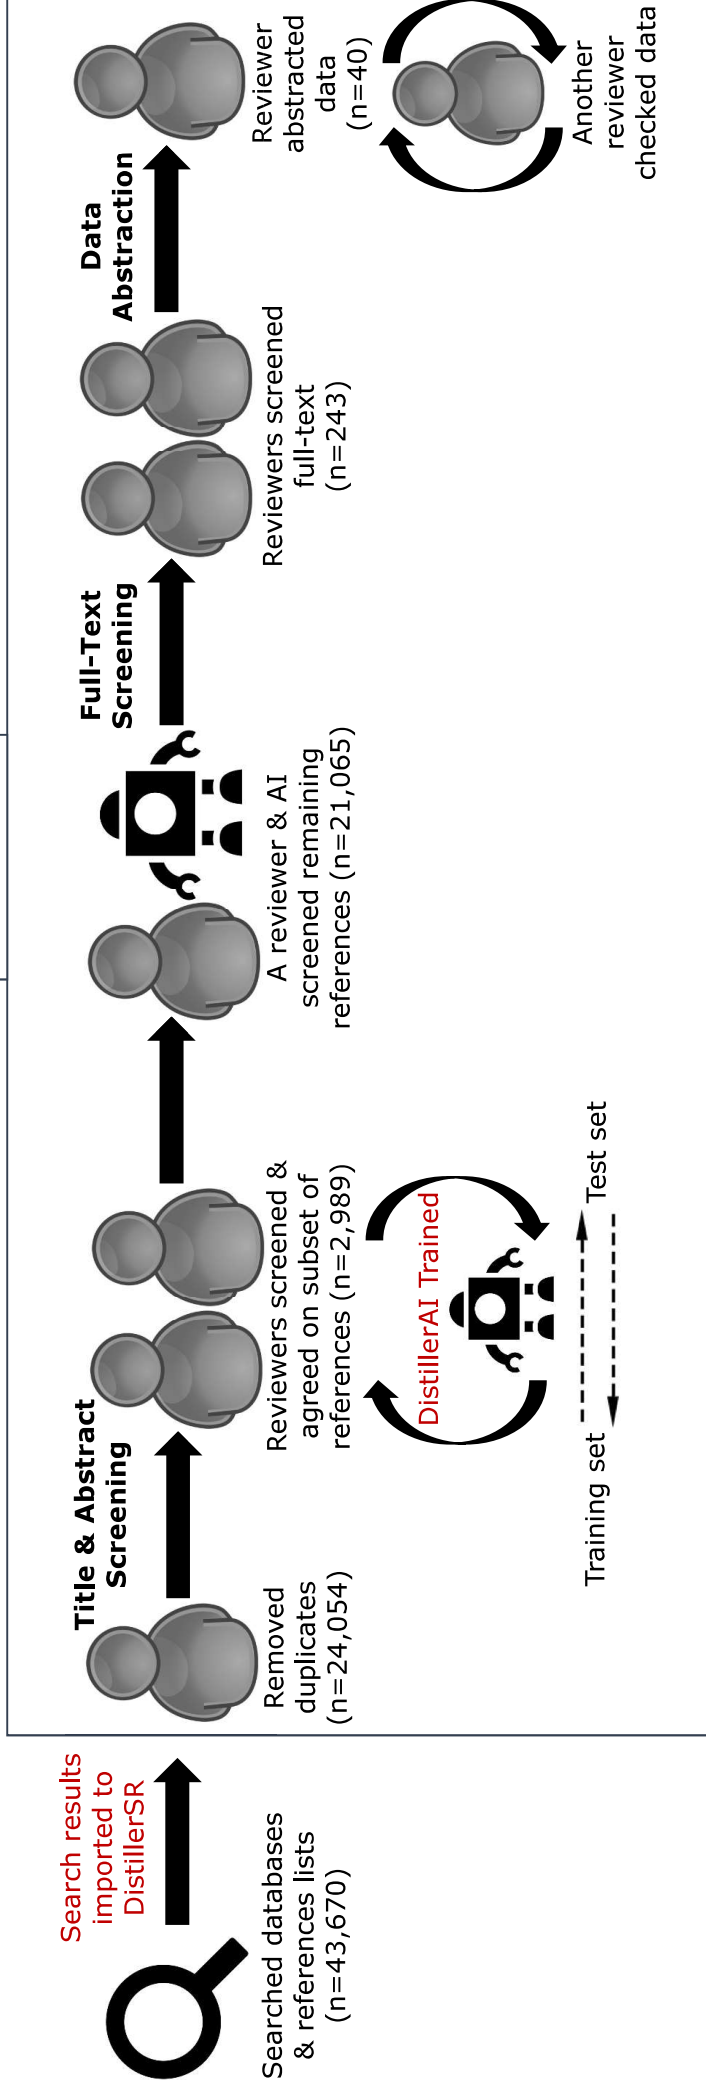

**Supplementary file 2:** Schematic of study selection using the AI feature of DistillerSR wherein human-reviewed steps are indicated by a person graphic and AI-steps are indicated by a robot graphic
